# Supplementary material for: Combination of resveratrol and luteolin ameliorates α-naphthylisothiocyanate-induced cholestasis by regulating the bile acid homeostasis and suppressing oxidative stress
Source: Royal Society of Chemistry journal article supplement (doi:10.1039/d2fo00521b), 2022-01-01
Supplement: d2fo00521b1.pdf [file d2fo00521b1.pdf]

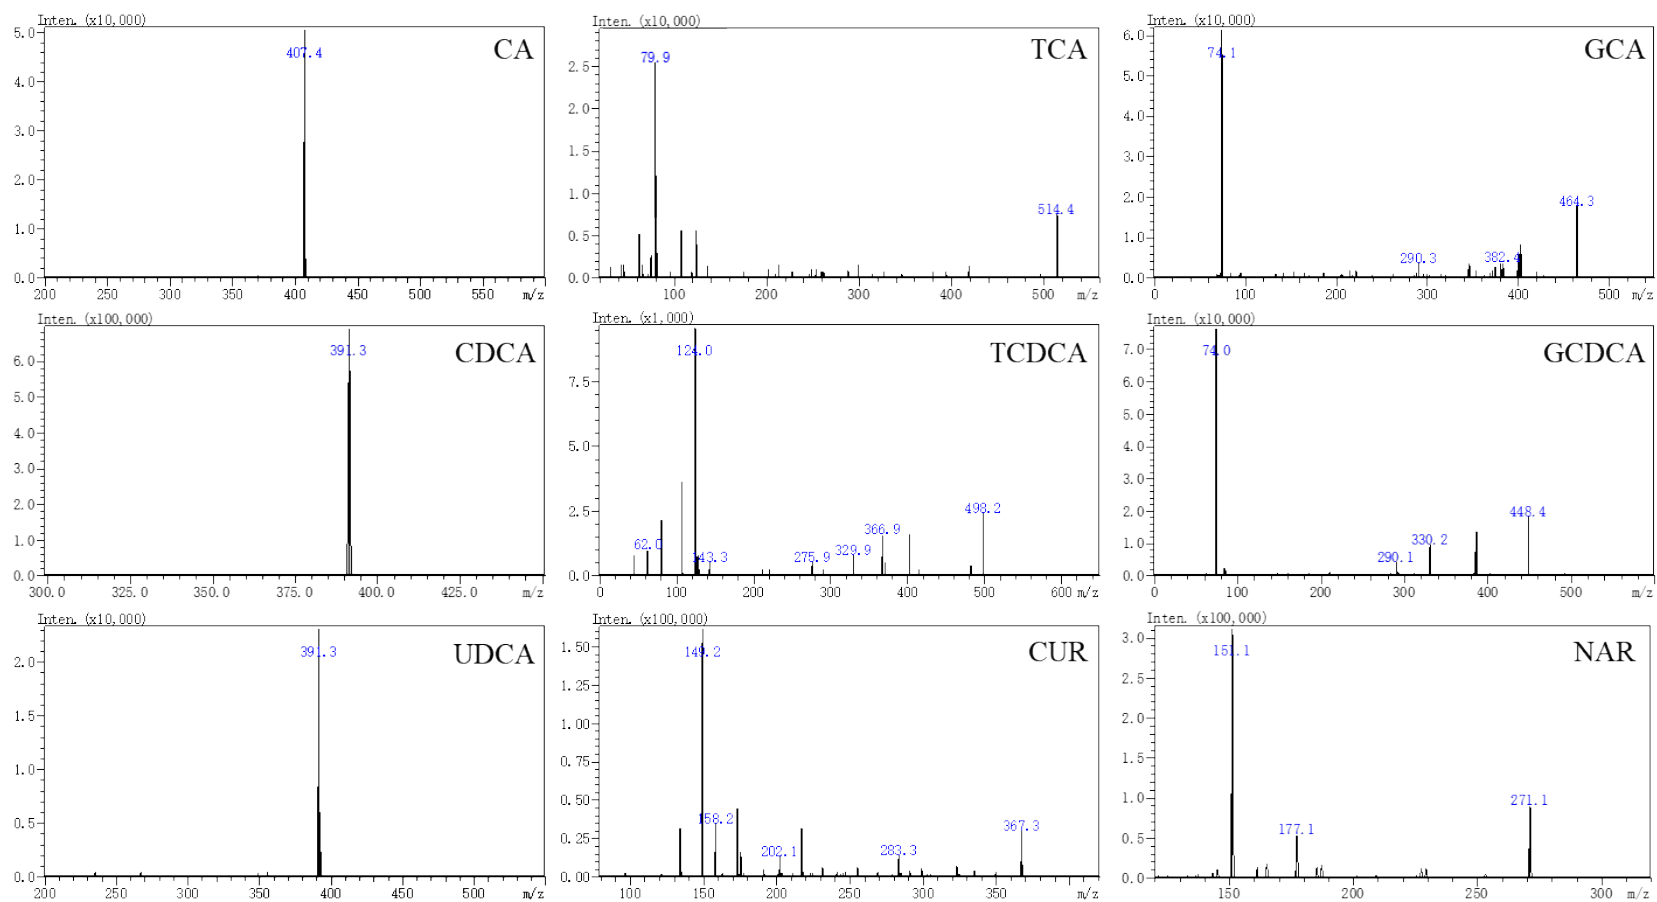

Fig. S1. The product ion spectra of the  $[M-H]^-$  ions of analytes and ISs

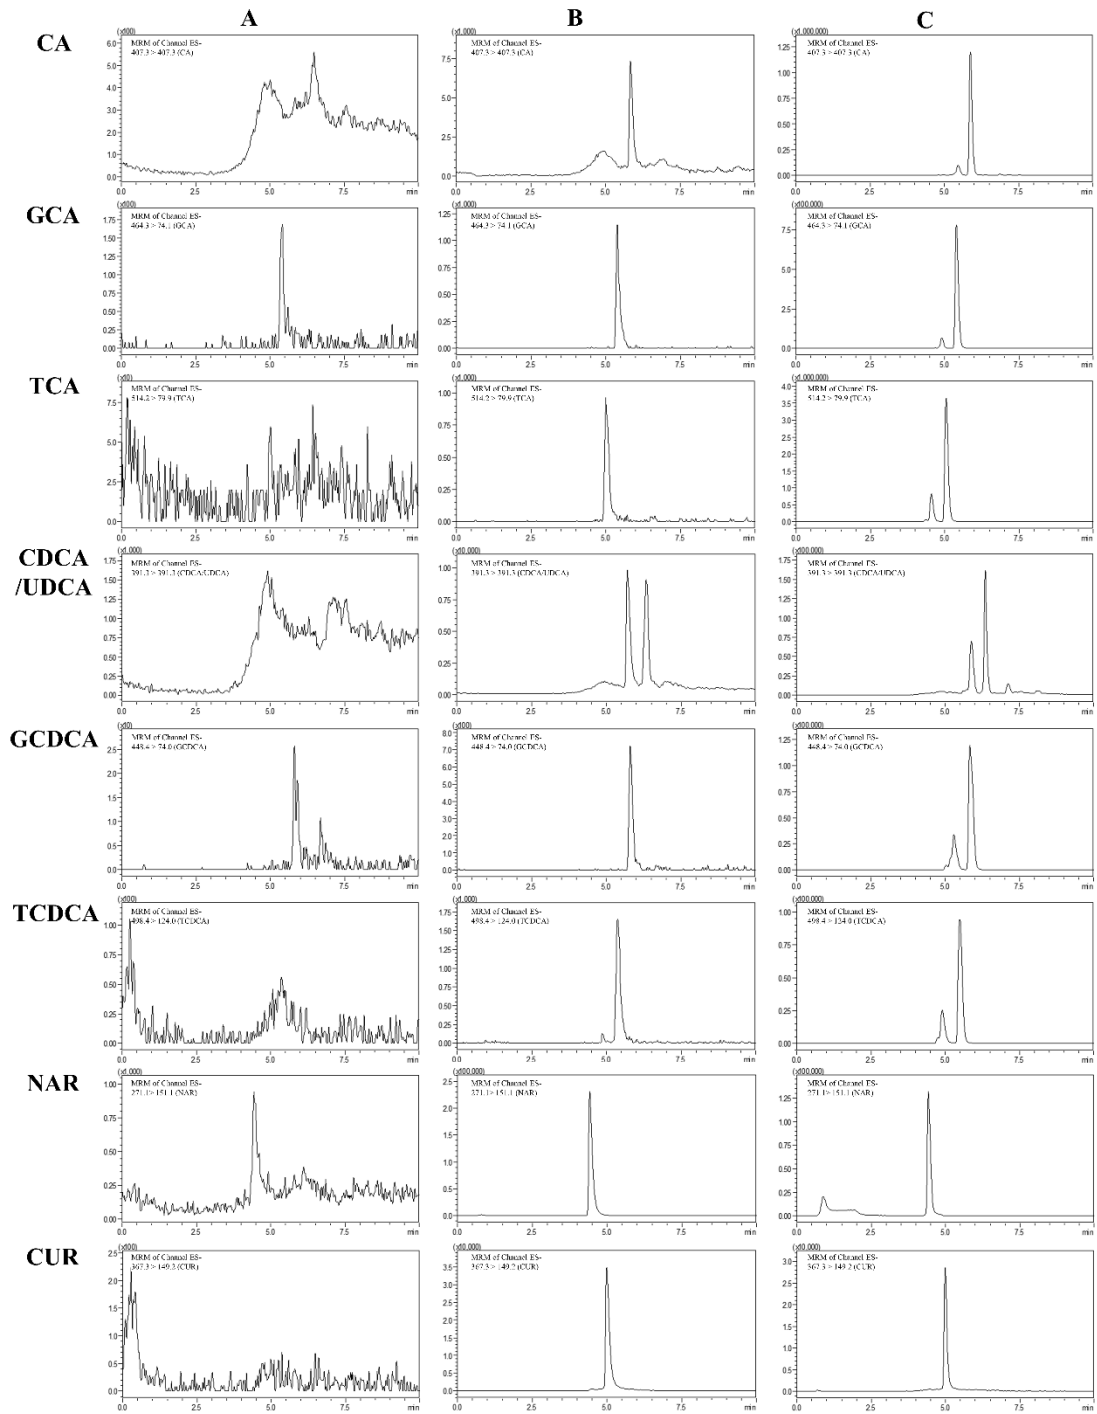

**Fig. S2.** MRM chromatograms for analytes and ISs from (A) a BAS-free liver sample, (B) a BAS-free liver sample spiked with LLOQ samples and IS solution (C) an authentic liver sample.

**Table S1** Linearity and LLOQ of analytes in liver samples.

| Analytes | Linear range<br>(ng/mL) | Calibration curve                                  | <i>r</i> | LLOQ<br>(ng/mL) |
|----------|-------------------------|----------------------------------------------------|----------|-----------------|
| CA       | 5-10000                 | $Y = 2.131 \times 10^{-2}X + 3.979 \times 10^{-2}$ | 0.9977   | 5               |
| GCA      | 5-20000                 | $Y = 3.714 \times 10^{-3}X + 5.490 \times 10^{-3}$ | 0.9961   | 5               |
| TCA      | 5-40000                 | $Y = 1.166 \times 10^{-3}X + 2.161 \times 10^{-3}$ | 0.9970   | 5               |
| CDCA     | 10-2000                 | $Y = 2.508 \times 10^{-3}X + 7.607 \times 10^{-3}$ | 0.9981   | 10              |
| GCDCA    | 1-2000                  | $Y = 2.159 \times 10^{-2}X + 9.421 \times 10^{-3}$ | 0.9974   | 1               |
| TCDC     | 5-20000                 | $Y = 2.423 \times 10^{-3}X + 3.674 \times 10^{-3}$ | 0.9984   | 5               |
| UDCA     | 10-5000                 | $Y = 3.407 \times 10^{-2}X + 6.393 \times 10^{-2}$ | 0.9944   | 10              |

**Table S2** Intra-day and inter-day precision and accuracy for assay of analytes in rat liver (mean  $\pm$  SD, n = 6, three consecutive days).

| Analytes | Added (ng/mL) | Found (ng/mL)<br>Mean $\pm$ SD | Accuracy | Precision         |                   |
|----------|---------------|--------------------------------|----------|-------------------|-------------------|
|          |               |                                | RE (%)   | Intra-day RSD (%) | Inter-day RSD (%) |
| CA       | 5             | 5.069 $\pm$ 0.254              | 1.4      | 4.9               | 5.8               |
|          | 10            | 10.18 $\pm$ 0.59               | 1.9      | 5.6               | 7.7               |
|          | 250           | 248.1 $\pm$ 13.1               | -0.8     | 4.5               | 9.5               |
|          | 8000          | 7520 $\pm$ 255                 | -6.0     | 3.6               | 2.1               |
| GCA      | 5             | 5.039 $\pm$ 0.343              | 0.8      | 6.7               | 8.1               |
|          | 10            | 10.29 $\pm$ 0.69               | 2.9      | 6.7               | 7.7               |
|          | 500           | 494.5 $\pm$ 38.0               | -1.1     | 7.7               | 7.9               |
|          | 16000         | 15046 $\pm$ 891                | -6.0     | 5.3               | 9.7               |
| TCA      | 5             | 5.066 $\pm$ 0.311              | 1.3      | 5.5               | 9.8               |
|          | 10            | 10.16 $\pm$ 0.72               | 1.6      | 7.5               | 2.3               |
|          | 500           | 506.8 $\pm$ 36.4               | 1.4      | 7.2               | 7.1               |
|          | 32000         | 32562 $\pm$ 2101               | 1.8      | 6.1               | 8.8               |
| CDCA     | 10            | 10.04 $\pm$ 0.71               | 0.4      | 7.3               | 5.7               |
|          | 20            | 20.42 $\pm$ 1.47               | 2.1      | 7.0               | 9.2               |
|          | 200           | 200.9 $\pm$ 13.1               | 0.4      | 6.1               | 9.4               |
|          | 1600          | 1742 $\pm$ 92                  | 8.8      | 4.5               | 9.3               |
| GCDCA    | 1             | 1.011 $\pm$ 0.075              | 1.1      | 7.7               | 6.2               |
|          | 2             | 2.032 $\pm$ 0.112              | 1.7      | 4.7               | 9.8               |
|          | 50            | 48.31 $\pm$ 2.50               | -3.4     | 4.9               | 7.0               |
|          | 1600          | 1603 $\pm$ 99                  | 0.2      | 5.2               | 11                |
| TCDCA    | 5             | 5.047 $\pm$ 0.295              | 0.9      | 5.9               | 5.6               |
|          | 10            | 10.04 $\pm$ 0.70               | 0.4      | 6.9               | 8.3               |
|          | 500           | 493.6 $\pm$ 31.8               | -1.3     | 6.2               | 8.4               |
|          | 16000         | 15599 $\pm$ 983                | -2.5     | 5.9               | 8.9               |
| UDCA     | 10            | 9.98 $\pm$ 0.66                | -0.2     | 6.8               | 5.5               |
|          | 20            | 20.88 $\pm$ 1.09               | 4.5      | 5.4               | 4.4               |
|          | 200           | 208.0 $\pm$ 11.3               | 4.0      | 4.6               | 9.6               |
|          | 4000          | 4380 $\pm$ 184                 | 9.5      | 4.0               | 5.6               |

**Table S3** Matrix effect and extraction recovery for analytes in rat liver (n = 6).

| Analytes | Analyte concentration (ng/mL) | Extraction recovery (%) | Matrix effect (%) |
|----------|-------------------------------|-------------------------|-------------------|
|          |                               | Mean $\pm$ SD           | Mean $\pm$ SD     |
| CA       | 10                            | 85.6 $\pm$ 3.4          | 111.8 $\pm$ 6.2   |
|          | 250                           | 90.4 $\pm$ 6.8          | 101.5 $\pm$ 5.4   |
|          | 8000                          | 89.1 $\pm$ 3.0          | 95.3 $\pm$ 1.7    |
| GCA      | 10                            | 93.0 $\pm$ 9.8          | 106.3 $\pm$ 3.8   |
|          | 500                           | 88.0 $\pm$ 7.6          | 103.7 $\pm$ 5.7   |
|          | 16000                         | 92.8 $\pm$ 7.5          | 108.3 $\pm$ 4.8   |
| TCA      | 10                            | 83.4 $\pm$ 3.9          | 110.3 $\pm$ 7.1   |
|          | 500                           | 88.7 $\pm$ 9.6          | 98.6 $\pm$ 5.0    |
|          | 32000                         | 89.3 $\pm$ 6.8          | 100.6 $\pm$ 5.5   |
| CDCA     | 20                            | 88.1 $\pm$ 3.8          | 107.0 $\pm$ 7.5   |
|          | 200                           | 88.6 $\pm$ 6.3          | 100.2 $\pm$ 4.8   |
|          | 1600                          | 87.2 $\pm$ 7.5          | 110.1 $\pm$ 6.4   |
| GCDCA    | 2                             | 88.5 $\pm$ 4.7          | 99.1 $\pm$ 5.4    |
|          | 50                            | 92.6 $\pm$ 2.1          | 100.3 $\pm$ 5.5   |
|          | 1600                          | 87.8 $\pm$ 6.6          | 104.0 $\pm$ 7.2   |
| TCDCA    | 10                            | 84.4 $\pm$ 5.0          | 104.5 $\pm$ 4.1   |
|          | 500                           | 89.7 $\pm$ 4.1          | 100.0 $\pm$ 5.2   |
|          | 16000                         | 87.9 $\pm$ 6.8          | 111.1 $\pm$ 7.9   |
| UDCA     | 20                            | 83.1 $\pm$ 3.4          | 109.8 $\pm$ 5.7   |
|          | 200                           | 90.2 $\pm$ 7.5          | 99.0 $\pm$ 5.2    |
|          | 4000                          | 85.0 $\pm$ 4.8          | 97.9 $\pm$ 5.4    |

**Table S4** Stability for assay of analytes in rat liver under different storage conditions (mean  $\pm$  SD, n = 3).

| Analytes | Added<br>(ng/mL) | Room temperature for 12 h |     | Pretreatment for 8 h |     | Freeze–thaw stability |     | -80°C frozen storage for 30 days |     |
|----------|------------------|---------------------------|-----|----------------------|-----|-----------------------|-----|----------------------------------|-----|
|          |                  | Found (ng/mL)             | RSD | Found (ng/mL)        | RSD | Found (ng/mL)         | RSD | Found (ng/mL)                    | RSD |
|          |                  | Mean $\pm$ SD             | (%) | Mean $\pm$ SD        | (%) | Mean $\pm$ SD         | (%) | Mean $\pm$ SD                    | (%) |
| CA       | 10               | 10.20 $\pm$ 0.42          | 4.1 | 9.85 $\pm$ 0.70      | 7.1 | 9.10 $\pm$ 0.18       | 2.0 | 9.63 $\pm$ 0.60                  | 6.3 |
|          | 250              | 264.2 $\pm$ 25.4          | 9.7 | 278.2 $\pm$ 2.9      | 1.1 | 272.3 $\pm$ 15.6      | 5.8 | 265.5 $\pm$ 25.5                 | 9.7 |
|          | 8000             | 7372 $\pm$ 403            | 5.5 | 7738 $\pm$ 435       | 5.7 | 7571 $\pm$ 668        | 8.9 | 7449 $\pm$ 294                   | 4.0 |
| GCA      | 10               | 10.45 $\pm$ 0.12          | 1.1 | 10.56 $\pm$ 0.67     | 6.4 | 10.71 $\pm$ 0.36      | 3.3 | 10.71 $\pm$ 0.54                 | 5.1 |
|          | 500              | 538.6 $\pm$ 48.5          | 9.0 | 560.9 $\pm$ 1.4      | 0.3 | 524.8 $\pm$ 11.9      | 2.3 | 546.5 $\pm$ 41.3                 | 7.6 |
|          | 16000            | 14310 $\pm$ 299           | 2.1 | 14917 $\pm$ 1374     | 9.3 | 14777 $\pm$ 658       | 4.5 | 14029 $\pm$ 331                  | 2.4 |
| TCA      | 10               | 11.04 $\pm$ 0.34          | 3.1 | 10.50 $\pm$ 1.04     | 9.9 | 10.38 $\pm$ 0.62      | 6.0 | 10.39 $\pm$ 0.30                 | 2.9 |
|          | 500              | 520.1 $\pm$ 52.9          | 11  | 558.5 $\pm$ 9.6      | 1.8 | 559.4 $\pm$ 6.8       | 1.3 | 496.1 $\pm$ 52.2                 | 11  |
|          | 32000            | 32890 $\pm$ 996           | 3.1 | 31491 $\pm$ 1662     | 5.3 | 34840 $\pm$ 2659      | 7.7 | 28432 $\pm$ 650                  | 2.3 |
| CDCA     | 20               | 18.94 $\pm$ 1.19          | 6.3 | 19.00 $\pm$ 1.69     | 8.9 | 18.57 $\pm$ 0.90      | 4.9 | 18.49 $\pm$ 0.71                 | 3.9 |
|          | 200              | 182.0 $\pm$ 8.7           | 4.8 | 179.6 $\pm$ 6.8      | 3.8 | 178.5 $\pm$ 6.2       | 3.5 | 182.6 $\pm$ 14.1                 | 7.8 |
|          | 1600             | 1383 $\pm$ 21             | 1.5 | 1437 $\pm$ 30        | 2.1 | 1444 $\pm$ 67         | 4.7 | 1441 $\pm$ 55                    | 3.8 |
| GCDCA    | 2                | 2.063 $\pm$ 0.191         | 9.3 | 2.096 $\pm$ 0.066    | 3.2 | 1.966 $\pm$ 0.204     | 11  | 2.079 $\pm$ 0.165                | 8.0 |
|          | 50               | 46.11 $\pm$ 2.39          | 5.2 | 52.35 $\pm$ 4.59     | 8.8 | 54.19 $\pm$ 3.07      | 5.7 | 45.15 $\pm$ 2.85                 | 6.4 |
|          | 1600             | 1690 $\pm$ 57             | 3.4 | 1628 $\pm$ 78        | 4.9 | 1730 $\pm$ 118        | 6.8 | 1435 $\pm$ 58                    | 4.1 |
| TCDCA    | 10               | 10.94 $\pm$ 0.13          | 1.3 | 10.97 $\pm$ 0.32     | 2.9 | 8.93 $\pm$ 0.16       | 1.8 | 9.98 $\pm$ 0.96                  | 9.7 |
|          | 500              | 498.2 $\pm$ 59.7          | 12  | 515.8 $\pm$ 33.4     | 6.5 | 512.2 $\pm$ 50.8      | 10  | 490.0 $\pm$ 34.9                 | 7.2 |
|          | 16000            | 16562 $\pm$ 646           | 3.9 | 16797 $\pm$ 1109     | 6.6 | 14821 $\pm$ 354       | 2.4 | 15310 $\pm$ 1818                 | 12  |
| UDCA     | 20               | 21.07 $\pm$ 0.90          | 4.3 | 21.23 $\pm$ 1.43     | 6.8 | 20.28 $\pm$ 0.18      | 0.9 | 19.07 $\pm$ 0.63                 | 3.3 |
|          | 200              | 201.0 $\pm$ 11.7          | 5.9 | 209.8 $\pm$ 3.4      | 1.7 | 187.1 $\pm$ 5.2       | 2.8 | 184.3 $\pm$ 9.5                  | 5.2 |
|          | 4000             | 4459 $\pm$ 131            | 3.0 | 3890 $\pm$ 305       | 7.9 | 3917 $\pm$ 277        | 7.1 | 4501 $\pm$ 107                   | 2.4 |

**Table S5** Dilution integrity for assay of analytes in rat liver (mean  $\pm$  SD, n = 6).

| Analytes | Dilution factors | Added (ng/mL) | Found (ng/mL)<br>Mean $\pm$ SD | Accuracy | Precision |
|----------|------------------|---------------|--------------------------------|----------|-----------|
|          |                  |               |                                | RE (%)   | RSD (%)   |
| CA       | 4                | 30000         | 7927 $\pm$ 294                 | 5.7      | 3.7       |
| GCA      | 4                | 60000         | 14712 $\pm$ 328                | -1.9     | 4.2       |
| TCA      | 8                | 240000        | 29895 $\pm$ 880                | -0.4     | 12        |
| CDCA     | 4                | 6000          | 1457 $\pm$ 146                 | -2.9     | 2.0       |
| GCDCA    | 4                | 6000          | 1503 $\pm$ 124                 | 0.2      | 1.6       |
| TCDC     | 4                | 60000         | 14122 $\pm$ 792                | -5.9     | 10        |
| UDCA     | 4                | 16000         | 4283 $\pm$ 158                 | 7.1      | 2.0       |
